1 **Interacting effects of cold snaps, rain, and agriculture on the fledging success of a declining**  
2 **aerial insectivore**

3 Daniel R. Garrett\*<sup>1,2</sup>, Fanie Pelletier<sup>1</sup>, Dany Garant<sup>1</sup>, and Marc Bélisle<sup>1</sup>

4 Author's Affiliations

5 <sup>1</sup>Département de biologie, Université de Sherbrooke, 2500 Boulevard de l'Université,  
6 Sherbrooke, Québec J1K2R1 Canada

7 <sup>2</sup>daniel.garrett88@gmail.com

8 \*Corresponding author: Université de Sherbrooke, 2500 boulevard de l'Université, Sherbrooke,  
9 Qc, Canada, J1K 2R1

10 **Abstract**

11 Climate change predicts the increased frequency, duration, and intensity of inclement weather  
12 periods, such as unseasonably low temperatures and prolonged precipitation. Many migratory  
13 species have advanced the phenology of important life history stages, and as a result are likely  
14 exposed to these periods of inclement spring weather more often, thus risking reduced fitness  
15 and population growth. For declining avian species, including aerial insectivores, anthropogenic  
16 landscape changes such as agricultural intensification are another driver of population declines.  
17 These landscape changes may affect the foraging ability of food provisioning parents, as well as  
18 reduce nestling's probability to survive periods of inclement weather, through for example  
19 pesticide exposure impairing thermoregulation and punctual anorexia. Breeding in agro-intensive  
20 landscapes may thus exacerbate the negative effects of inclement weather under climate change.  
21 We used daily temperatures related to significant reductions of insect prey availability (cold  
22 snaps), combined with measures of precipitation, and assessed their impact on Tree Swallow  
23 (*Tachycineta bicolor*) fledging success, a declining aerial insectivore breeding across a gradient  
24 of agricultural intensification. Fledging success decreased with the number of cold snap days  
25 experienced by a brood, and this relationship was worsened during periods of prolonged  
26 precipitation. We further found the overall negative effects of experiencing periods of inclement  
27 weather are exacerbated in more agro-intensive landscapes. Our results indicate that two of the  
28 primary hypothesized drivers of many avian population declines may interact to further increase  
29 the rate of declines in certain landscape contexts.

30 Key words: aerial insectivores; agricultural intensification; climate change; cold snap; fledging  
31 success; precipitation; *Tachycineta bicolor*; Tree Swallows.

## 32 **Introduction**

33 Several avian groups are seeing dramatic population declines (Rosenberg et al. 2019). Population  
34 estimates of many North American farmland and grassland birds, including aerial insectivores,  
35 suggest declines of over 50% since the 1970s (Stanton et al. 2018, Rosenberg et al. 2019). The  
36 spatio-temporal occurrence of these declines has led to the hypothesis that they are driven by a  
37 combination of global climate change and large-scale landscape modifications (Stanton et al.  
38 2018, Spiller and Dettmers 2019), and particularly the process of agricultural intensification  
39 (Stanton et al. 2018).

40 In the northern hemisphere, global climate change has resulted in earlier spring temperatures  
41 (McCarty 2001). The swift rate of change may lead to migrating species being unable to  
42 compensate for changes in thermally suitable habitats through dispersal, plasticity, or evolution  
43 (Crick 2004, Visser and Gienapp 2019). The inability of species to respond to such changes may  
44 generate or accentuate phenological mismatches between peaks of seasonal food resources and  
45 peaks in resource requirements of migratory species, and as a result, cause fitness decreases due  
46 to overall mistimed breeding schedules (Visser and Gienapp 2019). Furthermore, global climate  
47 change predicts increases in the frequency and intensity of inclement spring weather, such as  
48 swift changes in ambient temperature (e.g. cold snaps) and prolonged periods of precipitation  
49 (Rahmstorf and Coumou 2011, Wuebbles et al. 2014). Individuals experiencing such periods of  
50 inclement weather may be subjected to the reduction of temperature-dependent food resources,  
51 as well as to the additional consequence of the direct effects of poor weather on  
52 thermoregulation, and may thus incur reductions in annual fitness (Pipoly et al. 2013, Moreno et  
53 al. 2015, Arbeiter et al. 2016, Marcelino et al. 2020). Therefore, migrating species adapting to  
54 global changes through advancing their spring migration, may be at greater risk of experiencing

55 periods of inclement weather (Both et al. 2010, Visser and Gienapp 2019). The phenological  
56 advancement of several declining species has recently been observed (Dunn and Winkler 1999,  
57 Møller et al. 2006, Townsend et al. 2013, Bourret et al. 2015). For example, two Tree Swallow  
58 (*Tachycineta bicolor*) populations located respectively in Ontario, Canada, and New York State,  
59 USA, observe both chronic population declines and advanced clutch initiation dates (Dunn and  
60 Winkler 1999, Shutler et al. 2012). During the same period of declines, a significant increase in  
61 the number of poor weather days (e.g., unseasonably low temperatures or prolonged  
62 precipitation) was observed and resulted in elevated nestling mortality associated with these poor  
63 weather days (Cox et al. 2019, Shipley et al. 2020).

64 The declines of farmland and grassland birds are correlated with not only climate change but also  
65 with the process of agricultural intensification (Stanton et al. 2018, Spiller and Dettmers 2019).  
66 Hypothesized agricultural drivers of declines are divided into direct (e.g., habitat loss,  
67 mechanization resulting in nest destruction, or acute pesticide exposure) and indirect effects,  
68 principally through the reduction in prey availability or sublethal pesticide exposure (Benton et  
69 al. 2003, Stanton et al. 2018). Certain agricultural practices are observed to alter insect  
70 populations and communities through changes in abundance, phenology, or species composition  
71 and interactions (Grüebler et al. 2008, Pisa et al. 2015, Wagner 2020). Insectivorous birds  
72 breeding in modern agricultural landscapes, including aerial insectivores, could thereby be  
73 subjected to reduced availability of prey items (Poulin et al. 2010, Nocera et al. 2012, Garrett et  
74 al. 2021a).

75 Agricultural drivers of population declines may also impact the physiology of birds in ways that  
76 influence their capacity to respond adaptively to periods of inclement weather. For instance,  
77 sublethal exposure to organophosphate and carbamate insecticides may induce short-lived

78 hypothermia, likely due to the impairment of thermoregulation (Grue et al. 1997). Moreover,  
79 sublethal exposure to neonicotinoid insecticides may result in anorexia (Eng et al. 2019), thereby  
80 aggravating reduced thermoregulatory capacity and other challenges posed by reduced prey  
81 availability (Garrett et al. 2021a). Birds breeding within more agro-intensive landscapes are at  
82 elevated risk of exposing themselves or their offspring to such agents (DiBartolomeis et al. 2019,  
83 Malaj et al. 2020, Sigouin et al. 2021) and may subsequently be less likely to survive through  
84 periods of poor weather. Furthermore, landscapes dominated by row crop monocultures express  
85 landscape simplification in which large swaths of areas are occupied by only a handful of  
86 habitats (Benton et al. 2003). This phenomenon may make finding and exploiting suitable food  
87 resources more difficult for animals relying upon “residual” marginal habitats, as landscape  
88 simplification lowers the functional connectivity of agricultural landscapes (Hinsley 2000,  
89 Bélisle 2005, Rainho and Palmeirim 2011). Parents may compensate for poor breeding landscape  
90 quality by increasing foraging effort, but such increases may result in reduced body condition  
91 (Hinsley 2000, Olsson et al. 2008). Periods of inclement weather may thus exacerbate the added  
92 stressors stemming from breeding within more agro-intensive landscapes (Stanton et al. 2016,  
93 Staggenborg et al. 2017, Evens et al. 2018, Garrett et al. 2021b). Therefore, given that selection  
94 favors earlier breeding events (Sheldon et al. 2003, Porlier et al. 2012, Marrot et al. 2017), it  
95 seems imperative to evaluate how the expected increase of inclement weather events may  
96 interact with the consequences of breeding within more agro-intensive landscapes.

97 Here we present the results of an 11-year study monitoring the breeding success of a Tree  
98 Swallow population experiencing a wide range of spring temperatures and precipitation. This  
99 population breeds within a nesting box system placed along a gradient of agricultural  
100 intensification in southern Québec, Canada. We first identified a critical temperature in which

101 the availability of their main prey, namely Diptera (Bellavance et al. 2018), changed  
102 significantly, using an approach similar to Winkler et al. (2013). We then defined days in which  
103 ambient temperature fell below this critical temperature as a day representing a cold snap. We  
104 then evaluated the interacting roles that cold snaps, prolonged precipitation and the gradient of  
105 agricultural intensification had on fledging success within this population. As observed by Cox et  
106 al. (2019) and Shipley et al. (2020), we expected cold snaps to reduce fledging success, and the  
107 effect size to increase with both the duration of the cold snap and the total amount of  
108 precipitation. Finally, we expected the severity of these relationships to increase as breeding  
109 landscapes became increasingly composed of agro-intensive cultures.

## 110 **Methods**

### 111 **Study area and nest box system**

112 Between 2006 and 2016, we monitored breeding attempts of Tree Swallows within 400 nest  
113 boxes dispersed across a gradient of agricultural intensification in southern Québec, Canada. Ten  
114 nest boxes were spaced approximately 50 m apart along the field margins of 40 farms, located in  
115 various agricultural landscape contexts (Figure 1; see Ghilain and Bélisle 2008 for details). The  
116 gradient of agricultural intensification was characterized by an east-west shift of agricultural  
117 production. The eastern portion of the system was composed primarily of pastures and forage  
118 crops (e.g., hay, alfalfa (*Medicago sativa*), and clover (*Trifolium spp.*)), requiring less  
119 agricultural inputs and interspersed with large expanses of forest cover. The west was dominated  
120 by large-scale row-crop monocultures (principally corn (*Zea mays*), soybean (*Glycine max*) and  
121 wheat (*Triticum spp.*)) and was denuded of forest cover (Jobin et al. 2003, Ruiz and Domon  
122 2009). Increased use of monocultures has resulted in a near reliance on fertilizers, pesticides,  
123 mechanization and drainage of surface waters and wetlands (Jobin et al. 2003). Between 2011 to

124 2019, approximately 100% of the corn and 60% of the soybean were sown as neonicotinoid-  
125 coated seeds in our study area (MDDELCC 2015). As a consequence, the rate at which several  
126 pesticides were detected above the levels deemed safe for the chronic exposure for aquatic life  
127 has increased in the surface waters of this region (Giroux 2019).

### 128 **Nest box monitoring**

129 We monitored the breeding activity in nest boxes every two days, starting prior to the arrival of  
130 Tree Swallows. This detailed monitoring allowed us to estimate the dates of laying, incubation,  
131 hatching, and fledging, as well as to record the number of eggs, nestlings, and fledglings of each  
132 breeding event. We caught and banded adult females during incubation and adult males during  
133 food provisioning. We were 99% and 80% successful, respectively, at capturing targeted adults.  
134 We applied an aluminum US Geological Survey (USGS) band containing a unique identification  
135 code to adults upon capture and nestlings at 12 days post hatching.

### 136 **Insect sampling and local prey availability**

137 Throughout the study, 2 insect traps were placed on each of the 40 farms (N=80). Traps were  
138 spaced ~ 250 m apart along the central portion of each nest box transect. Trap content was  
139 collected every two days throughout each breeding season (see Garrett et al. 2021a for details).  
140 The processing of insect samples focused on the period between 1 June and 15 July, covering the  
141 nestling rearing period of 96% of the monitored breeding attempts. The content of traps included  
142 a wide range of insects stemming from many of the surrounding habitat types, and that over lap  
143 significantly the diet of nestlings (Laplante 2013, Bellavance et al. 2018). In this system, 74% of  
144 the biomass of the food boluses provided to nestlings were Diptera (Bellavance et al. 2018), a  
145 pattern shared with other Tree Swallows study systems (Mengelkoch et al. 2004, Twining et al.  
146 2018). We thus used the biomass of Diptera within each sample as a proxy of local prey

147 availability (using the number of Diptera resulted in qualitatively similar results and Diptera was  
148 substantially favored over analyses incorporating the biomass of all insect taxa; model selection  
149 analyses not shown). Once extracted, Diptera samples were placed in an oven at 60°C for over 24  
150 hours, ensuring no further change in biomass occurred and were then weighed without delay to  
151 the nearest 0.0001 g. The dried biomass of Diptera from these samples (hereafter referred to as  
152 Diptera biomass) thus represents an estimate of local prey availability on a specific farm and  
153 year over the two days prior to the sample collection.

#### 154 **Landscape composition**

155 Landscape composition (i.e. the relative coverage of habitats composing a given landscape)  
156 focused on habitats influential to Tree Swallows and ones composing landscapes throughout our  
157 study system (Rendell and Robertson 1989, 1990, Winkler et al. 2020). The relative cover of  
158 habitats was calculated within 500 m of nest boxes, a spatial scale in which ~80% of food  
159 provisioning adult female Tree Swallows spend their time (Elgin et al. 2020, Garrett et al.  
160 2021b). Tree Swallows are often associated with open bodies of water and will travel distances  
161 greater than 500 m to forage over them (Elgin et al. 2020, Garrett et al. 2021b). The relative  
162 cover of this habitat within 500 m of nest boxes ( $0.66\% \pm 1.07\%$ ) and in the agricultural contexts  
163 covered by this study is low. Recognizing this habitat as important to Tree Swallows (Berzins et  
164 al. 2021), we calculated its relative cover at 3 km from nest boxes following methods presented  
165 in Garrett et al. (2021a). Calculations used vector layers acquired from the Canadian National  
166 Hydro Network (NHN, 2020) and the `sf` (Pebesma 2018) and `rgeos` (Bivand and Rundel 2019)  
167 packages in R version 3.6.2 (R Core Team 2019). Characterization within 500 m of nest boxes  
168 occurred separately for each farm at the end of each breeding season to facilitate crop  
169 identification. Parcels representing different habitats and agricultural fields were first delineated



170 using orthophotos (scale 1:40,000) in QGIS (version 3.16) (QGIS 2020), and then characterized  
171 *in situ*. We determined which cultures, if any, were in agricultural fields and then reclassified  
172 them into forested, corn and soybean, forage fields (including hay, other grasses, alfalfa, clover,  
173 and pastures), and cereals (principally wheat, and to a lesser extent, oat (*Avena spp.*) and barley  
174 (*Hordeum spp.*)). We then calculated the mean percent cover of these habitats across the 10 nest  
175 boxes on each farm and for each year independently.

176 To obtain an integrative measure of the percent cover of habitat groups, defined as the landscape  
177 context, we used a robust principal components analysis (PCA) for compositional data  
178 (Filzmoser et al. 2009) to assign “site scores” to each of the farms during each year. Site scores  
179 were the values along the first two components of the resulting compositional PCA of each farm  
180 during each year. PCAs were fitted using the robCompositions package (Templ et al. 2011) in R,  
181 resulting in the calculation of 440 different landscape contexts (i.e. 40 farms x 11 years). Site  
182 scores were assigned to each breeding attempt and insect sample and used in all subsequent  
183 analyses.

184 The PCA’s first component (Comp.1) explained 80.34% of the variance in landcover, correlating  
185 positively with corn and soybean and negatively with both forage fields and forest cover. The  
186 second component (Comp.2) explained 14.69% and correlated negatively with forage fields and  
187 positively with forest cover (Figure 2). To avoid overly complex models, we included only these  
188 two components to represent the landscape context. Landscapes expressed by minimizing  
189 Comp.1 and Comp.2 values represent ones for which there is an abundance of forage fields and  
190 above average forest cover and are referred to as forage landscapes.

191 **Weather variables**

192 We monitored hourly temperature with iButtons (model DS1922L; Embedded Data Systems,  
193 Lawrenceburg, Kentucky, USA) attached to the underside of a single nest box on each farm.  
194 Temperatures were recorded throughout each breeding season and started prior to the spring  
195 arrival of Tree Swallows. We derived daily summaries of the minimum, mean, and maximum  
196 daily temperatures between daytime hours (05:00 to 20:00). We measured total farm-specific  
197 precipitation every two days throughout the breeding season using a single pluviometer placed  
198 on each farm and recorded measurements to the nearest 0.5 ml during each farm visit.

199 **Statistical analyses**

200 *Cold-snap days*

201 Cold snap values were grounded in the functional response of local prey availability to maximum  
202 daily temperature, as we expected insects to require a threshold temperature before they are  
203 active (Williams 1961, Gruebler et al. 2008). We calculated the mean maximum daily  
204 temperature between the day of and the day prior to sample collection (mean maximum daily  
205 temperature). We then used a similar approach to that of Winkler et al. (2013) using generalized  
206 additive mixed effects models (GAMMs) to model the relationship between Diptera biomass and  
207 mean maximum daily temperature to determine the temperature at which the instantaneous rate  
208 of biomass change was greatest. The cold snap threshold temperature was thus calculated as the  
209 temperature corresponding to the maximum of the first derivative of the relationship between  
210 Diptera biomass and mean maximum daily temperature. Peak rate in change was chosen because  
211 temperatures around this critical threshold likely result in dramatic differences in prey  
212 availability (Williams 1961). We undertook an extensive modeling exercise to determine the  
213 treatment of the functional relationship between these variables, including evaluating the

214 hypothesis that the critical threshold temperature varies along the agricultural intensification  
215 gradient (full details in Appendix S2). Modeling used the “bam” function from the mgcv  
216 package in R (Wood 2015). Diptera biomass was modeled with a Gamma distribution with a log  
217 link function. The influence of mean maximum daily temperature was treated as a tensor product  
218 smooth, and in order to evaluate overall trends, we kept the basis dimension of this predictor low  
219 ( $k=10$ ). In all models, we included the effect of Julian date of sample collection and precipitation  
220 as a tensor product smooth to account for phenological variations in biomass. We further  
221 included the year and farm as random effects to control for the hierarchical structure of the  
222 sampling design (Pedersen et al. 2019).

### 223 *Fledging success*

224 We limited analyses of fledging success to first breeding attempts (90% of all attempts and  
225 ranging between 80% and 95% across years), as reproductive success varies greatly between first  
226 and second attempts, and second attempts occur near exclusively following the failure of a nest  
227 during laying or incubation (Robertson and Rendell 2001). Fledging success was modeled as the  
228 proportion of a brood that fledged (i.e., number of successes over trials) via generalized linear  
229 mixed effects models (GLMMs) with a binomial distribution and logit link function. The year,  
230 farm, and nest box IDs were included as random factors to account for the hierarchical structure  
231 of the dataset (i.e., nest box nested within farm nested within year).

232 Model covariate summaries can be found in Table 1 and were averaged across a 12-day window  
233 post-hatching. This period is when Tree Swallow nestlings become homeothermic, reach peak  
234 body mass, and experience the greatest nestling mortality, thus representing the period where  
235 resource availability is presumably most crucial (McCarty and Winkler 1999, Houle et al. 2020).  
236 Cold temperatures and precipitation may act both directly on nestlings through thermoregulation

237 and indirectly through a reduction in resource availability. To control for trophic mediated  
238 indirect effects of weather on fledging success, we desired estimates of local prey availability  
239 during the nestling rearing period of each breeding attempt. Prey availability was represented by  
240 predictions from generalized additive models (GAMs) in which raw values of Diptera biomass  
241 were regressed against the Julian date of sample collection for each farm and year separately.  
242 Modeled Diptera availability captures its general phenology throughout each season, avoiding  
243 biases caused by more punctual or local disturbances or phenomena such as the capture of an  
244 insect swarm. From these predictions, we calculated an estimate of the mean prey availability  
245 during the respective 12-day window of each breeding attempt. GAMs were fitted as a tensor  
246 product smoother using the `mgcv` package in R and an identical degree of smoothness ( $k=10$ ).

247 We took an information theoretic and multimodel approach to assess how weather influenced  
248 fledging success and if its effect varied with landscape context (Burnham and Anderson 2002).  
249 We compared a set of competing models, including a Null model with only random effects.  
250 These data were previously used to determine the combined influence of prey availability and  
251 landscape context within our study area on fledging success, and as a result a most predictive and  
252 parsimonious model had then been determined (Garrett et al. 2021a). We thus compared all  
253 subsequent models to this base model (Base). This model included the age of the breeding  
254 female [second year (SY) vs. after second year (ASY); (Robertson and Rendell 2001)], hatching  
255 date, brood size, percent cover of open water within 3 km of the breeding attempt, and the  
256 interaction between site scores (Comp.1 and Comp.2) and prey availability estimates. To these  
257 variables we also added the number of cold snaps and the mean daily precipitation during the 12  
258 days following hatching, including the interaction between these variables, as these factors are  
259 identified as influential to Tree Swallows from other study systems (Cox et al. 2019, Shipley et

260 al. 2020). All model terms within Base were included in all subsequent models of the candidate  
261 set. Principal interests were in the interactive effects of cold snaps, precipitation, and the gradient  
262 of agricultural intensification on fledging success. We included models with interaction terms  
263 between Comp.1 and the number of cold snaps (Base + Land\*Snap), between Comp.1 and the  
264 mean precipitation (Base + Land\*Rain), or both of these interaction terms (Base + Land\*Snap +  
265 Land\*Rain). We further predicted these factors may interact with one another and included a  
266 model with a three-way interaction between these three variables (Base + Land\*Snap\*Rain).

267 The effects of key individual variables, including interactions, were estimated via multi-model  
268 inference whereby predictions were calculated by model-averaging with shrinkage and shown  
269 with their 95% unconditional confidence intervals (Burnham and Anderson 2002). All  
270 quantitative covariates were z-transformed, *R*-squares calculated following Nakagawa and  
271 Schielzeth (2013), and analyses performed in R using the glmmTMB (Brooks et al. 2017) and  
272 AICcmodavg (Mazerolle 2020) packages. Model validation, including evaluation of normally  
273 distributed residuals (simulated), heteroskedasticity, and collinearity checks with variance  
274 inflation factors (VIFs), followed Zuur et al. (2009) and used the DHARMA package (Hartig  
275 2020).

## 276 **Results**

### 277 **Effects of temperature on local prey availability**

278 We collected and processed 15,916 insect samples from 8,614 farm visits. Mean Diptera biomass  
279 ( $\pm$  SD) was  $0.030 \pm 0.044$  g (per trap), ranging between 0.019 g and 0.037 g across years.  
280 Overall mean maximum daily temperature ( $\pm$  SD) was  $25.7^{\circ}\text{C} \pm 4.1$  ranging between  $24.1^{\circ}\text{C}$  and  
281  $26.6^{\circ}\text{C}$  across years. The greatest instantaneous rate of change in Diptera biomass occurred at  
282  $18.2^{\circ}\text{C}$  (Figure 3, A and B). Around this critical threshold, a two degree decrease or increase in

283 maximum daily temperature led to a 13.4% drop or 15.1% rise in Diptera biomass, respectively.  
284 Based on this threshold, 8.2% of farm visits followed at least one cold snap (Appendix S1:  
285 Figure S1).

### 286 **Effects of inclement weather on fledging success**

287 We monitored the breeding activity of 1,897 nests across the 40 farms and 11 breeding seasons.  
288 Overall mean fledging success ( $\pm$  SD) was  $0.74 \pm 0.38$ , varying between 0.63 and 0.88 among  
289 years. Overall mean number of cold snap days ( $\pm$  SD) experienced by a brood during its first 12  
290 days was  $0.9 \pm 1.1$  days and varied between 0.2 and 2.3 days between years (Figure 4). At least  
291 52% of broods experienced at least one cold snap day throughout the duration of the study; 24%,  
292 11% and 4% of broods experienced at least 2, 3 and 4 cold snap days, respectively. Mean daily  
293 precipitation during the first 12 days ( $\pm$  SD) was  $3.4 \pm 2.3$  ml, ranging between 1.2 and 6.8 ml  
294 across years. The correlation between the number of cold snap days and mean daily precipitation  
295 experienced by a brood was relatively low ( $r=0.08$ ; Figure 4).

296 Models incorporating an interaction between Comp.1 and the number of cold snap days  
297 (combined AICc  $w > 0.99$ ) were substantially supported over Base ( $\Delta$ AICc  $> 14.11$ , Appendix  
298 S1: Table S1). Fledging success decreased with the number of cold snap days (Figure 5).  
299 Fledging success was on average 40.8% lower when broods experienced four cold snap days in  
300 their first 12 days instead of none. Increasing precipitation had a negative effect on fledging  
301 success, especially when broods were subjected to both several cold snap days and high daily  
302 amounts of precipitation (Figure 5). Broods subjected to four cold snap days versus none showed  
303 up to a 45.2% reduction in fledging success if exposed to the 95<sup>th</sup> percentile of observed values  
304 for mean daily precipitation. The effects of weather varied with landscape context (Figure 6).  
305 During periods of either increased cold snap days or precipitation, higher levels of agro-intensive

306 cover were associated to further reductions in fledging success (Figure 6). Without any cold snap  
307 days and under mean daily precipitation, fledging success was 4.8% greater in the most agro-  
308 intensive landscapes compared to forage landscapes. Yet, fledging success decreased by 44.2%  
309 along the agricultural intensification gradient when broods experienced four cold snap days and  
310 average precipitation. The synergistic negative effect of the number of cold snap days and high  
311 amount of precipitation on fledging success was, however, far greater in agro-intensive than in  
312 forage landscapes: in the absence of precipitation, the negative effect of increasing cold snap  
313 days was substantial only in agro-intensive landscapes, but similarly detrimental over the entire  
314 intensification gradient under high precipitation levels (Figure 6). Lastly, fledging success  
315 increased with local prey availability and percent cover of surface water within 3 km, it  
316 decreased with increasing hatching day and brood size, and was lower for SY than ASY females  
317 (Figure 5).

## 318 **Discussion**

319 An outcome of climate change is the increased frequency and duration of weather events  
320 potentially reducing the availability of thermally sensitive prey resources (Rahmstorf and  
321 Coumou 2011, Wuebbles et al. 2014). These reductions, when occurring during critical life  
322 history stages (e.g. nestling periods), reduce the fitness of avian aerial insectivores (Pipoly et al.  
323 2013, Moreno et al. 2015, Arbeiter et al. 2016). Though climate change influences a vast array of  
324 species and their interactions, another large-scale continued threat to biodiversity is  
325 anthropogenic reductions in habitat amounts and quality, notably through forestry and agriculture  
326 (Maxwell et al. 2016). We contended that the use of certain habitats may pose a risk to an  
327 animal's ability to breed or survive through periods of reduced food availability and/or poor  
328 weather. We provide evidence that the negative impact of weather conditions expected from

329 climate change on the annual breeding success of an aerial insectivore are exacerbated in habitats  
330 created by agricultural intensification.

331 The relationship between prey availability and mean maximum temperature, between the day of  
332 and day prior to sample collection, revealed the rate of change in prey availability was  
333 maximized at a temperature (18.2°C) similar to that deemed critical in past works (18.5°C;  
334 Winkler et al. 2013, Cox et al. 2019, Shipley et al. 2020). Such similarity may highlight a  
335 generality to temperatures impactful to Tree Swallows and their prey. We further found that this  
336 temperature threshold did not vary across the large-scale gradient of agricultural intensification  
337 studied here.

338 In accordance with previous studies, the appearance and frequency of cold snaps during the 12-  
339 day post hatching period of each brood led to reduced fledging success of Tree Swallows. This  
340 effect increased when cold snaps coincided with periods of prolonged rain. Most notably, the  
341 negative effect of poor weather was worse for breeding attempts in more agro-intensive  
342 landscapes. Such a result suggests features associated to these landscapes exacerbate the  
343 consequences of broods experiencing poor weather.

344 We propose two non-mutually exclusive mechanisms for such a finding: the structural  
345 characteristics of agro-intensive landscapes and the likelihood of exposure to agrochemical  
346 agents. Successfully acquiring food during periods of poor weather potentially result in greater  
347 costs for food provisioning parents, inasmuch as the increased foraging effort needed to  
348 overcome the reduced availability of prey likely results in reduced body condition (Hinsley 2000,  
349 Evens et al. 2018). Parents may possibly forgo foraging during poor weather periods in order to  
350 brood nestlings and provide food at greater rates once poor weather has subsided (Cox et al.  
351 2019). Given the homogeneity of intensively-managed agricultural landscapes, prey patches may



352 be fewer or farther apart therein (Benton et al. 2003, Fahrig et al. 2011). Increased foraging  
353 efforts following poor weather events may come at greater costs to foragers breeding in agro-  
354 intensive landscapes where energetic gain rates are already lower (Stanton et al. 2016, Garrett et  
355 al. 2021b). Furthermore, agro-intensive landscapes tend to be denuded of structural habitats (e.g.  
356 woodlots and hedgerows) (Figure 1; Benton et al. 2003, Fahrig et al. 2011). In addition to being  
357 prey habitat, these features may block wind, and their removal may limit prey aggregation  
358 (Evans et al. 2003, Gruebler et al. 2008) and facilitate heat dissipation of nests (Heenan 2013).  
359 Moreover, the likelihood of a brood to encounter a cold snap was greater within less agro-  
360 intensive landscapes (Appendix S3), suggesting we underestimate the consequences of rearing  
361 young within agro-intensive landscapes.

362 Evidence suggest several commonly used agrochemical agents can alter avian physiology,  
363 potentially hindering their response to poor weather (Mayne et al. 2005, Mineau and Palmer  
364 2013, Lopez-Antia et al. 2015, Gibbons et al. 2015), most notably through a reduction in  
365 thermoregulatory capacity (Grue et al. 1997). These same agents may also influence the ability  
366 for food provisioning parents to optimize foraging strategies, by inducing anorexia and impairing  
367 locomotor function and navigational capacity (Eng et al. 2019). These factors illustrate that  
368 within more agro-intensive landscapes, food provisioning parents may present longer foraging  
369 bouts, potentially at a cost to their own body condition, while also reducing the time spent  
370 brooding nestlings.

371 Our conclusions, as well as predicted impacts of climate change on aerial insectivores, assume  
372 food provisioning adults are unable or less capable to forage during periods of poor weather.  
373 However, fine scale movements of small passerines are becoming less difficult to monitor (Elgin  
374 et al. 2020, Garrett et al. 2021b), understanding such movements may further elucidate the

375 combined roles of breeding habitat quality and predictions of climate change on animal behavior.  
376 For instance, the increased food provisioning of nestlings by adults, following periods of poor  
377 weather (Cox et al. 2019), may be facilitated by foraging in more profitable habitat patches  
378 (Elgin et al. 2020, Geary et al. 2020, Garrett et al. 2021b). In the context of climate change, the  
379 combined roles of poor weather and landscape structure on foraging responses is still unknown.  
380 Validation of these assumptions will be imperative as the effectiveness of food provisioning,  
381 during periods of poor weather, likely varies across a gradient of breeding landscape quality.  
382 Finally, a focus here was on the effects of cold snaps, yet another growing concern of climate  
383 change are periods of high ambient temperature [i.e., heat waves; (Perkins-Kirkpatrick and  
384 Lewis 2020)]. The energetic expenditure of food provisioning Tree Swallows is potentially  
385 constrained by an upper thermal limit (Tapper et al. 2020). Moreover, prey availability decreased  
386 sharply above 30°C in our study system (Figure 3A). Food provisioning parents may thus be  
387 hindered and the effects of breeding within more agro-intensive landscapes may further be  
388 exacerbated during heat waves. Future work should focus on evaluating this hypothesis, as  
389 reduced food provisioning potentially results in reduced nestling growth and survival (Cox et al.  
390 2019, Garrett et al. 2021b).

391 Aerial insectivore populations are witnessing significant reductions in several parts of their North  
392 American and European breeding grounds (Spiller and Dettmers 2019, Rosenberg et al. 2019,  
393 Bowler et al. 2019), and we provide evidence that two of the primary hypotheses explaining  
394 reductions may interact to further intensify these declines. We propose that future work  
395 investigating aerial insectivore declines should explicitly focus not only on climate change or  
396 anthropogenic reductions or alterations of breeding habitats, but also on how these factors may  
397 interact with one another.

398 **Acknowledgments**

399 We are indebted to the farm owners who kindly accepted to partake in our long-term study since  
400 2004. Sincere thanks to the many graduate students, field and lab assistants who helped collect,  
401 enter, and proof data throughout the years, notably with respect to insect sample processing. This  
402 work was conducted under the approval of the animal care committee of the Université de  
403 Sherbrooke and was financially supported by Natural Sciences and Engineering Research  
404 Council of Canada (NSERC) discovery grants to FP, DG and MB, two team research grants from  
405 the Fonds de recherche du Québec—Nature et technologies (FRQNT) to FP, DG and MB, by the  
406 Canada Research Chairs program to FP and MB, as well as by New Opportunities Funds of the  
407 Canadian Foundation for Innovation (FCI) to FP, DG and MB, the Canadian Wildlife Service of  
408 Environment and Climate Change Canada and the Université de Sherbrooke.

409 **Literature cited**

- 410 Agriculture and Agri-Food Canada (AAFC). 2018. Annual Crop Inventory.  
411 <https://open.canada.ca/data/en/dataset/>.
- 412 Arbeiter, S., M. Schulze, P. Tamm, and S. Hahn. 2016. Strong cascading effect of weather  
413 conditions on prey availability and annual breeding performance in European bee-eaters  
414 *Merops apiaster*. *Journal of Ornithology* 157:155–163.
- 415 Bélisle, M. 2005. Measuring landscape connectivity: the challenge of behavioral landscape  
416 ecology. *Ecology* 86:1988–1995.
- 417 Bellavance, V., M. Bélisle, J. Savage, F. Pelletier, and D. Garant. 2018. Influence of agricultural  
418 intensification on prey availability and nestling diet in Tree Swallows (*Tachycineta bicolor*).  
419 *Canadian Journal of Zoology* 96:1053–1065.
- 420 Benton, T. G., J. A. Vickery, and J. D. Wilson. 2003. Farmland biodiversity: is habitat  
421 heterogeneity the key? *Trends in Ecology & Evolution* 18:182–188.
- 422 Berzins, L. L., A. K. Mazer, C. A. Morrissey, and R. G. Clark. 2021. Pre-fledging quality and  
423 recruitment in an aerial insectivore reflect dynamics of insects, wetlands and climate.  
424 *Oecologia*.
- 425 Bivand, R. S., and C. Rundel. 2019. Package ‘rgeos’ - Interface to Geometry Engine - Open  
426 Source (‘GEOS’).
- 427 Both, C., C. A. M. Van Turnhout, R. G. Bijlsma, H. Siepel, A. J. Van Strien, and R. P. B.  
428 Foppen. 2010. Avian population consequences of climate change are most severe for long-  
429 distance migrants in seasonal habitats. *Proceedings of the Royal Society B: Biological*  
430 *Sciences* 277:1259–1266.
- 431 Bourret, A., M. Bélisle, F. Pelletier, and D. Garant. 2015. Multidimensional environmental  
432 influences on timing of breeding in a tree swallow population facing climate change.  
433 *Evolutionary Applications* 8:933–944.
- 434 Bowler, D. E., H. Heldbjerg, A. D. Fox, M. Jong, and K. Böhning-Gaese. 2019. Long-term  
435 declines of European insectivorous bird populations and potential causes. *Conservation*  
436 *Biology* 33:1120–1130.
- 437 Brooks, M. E., K. Kristensen, K. J. van Benthem, A. Magnusson, C. W. Berg, A. Nielsen, H. J.  
438 Skaug, M. Mächler, and B. M. Bolker. 2017. glmmTMB balances speed and flexibility  
439 among packages for zero-inflated generalized linear mixed modeling. *R Journal*.
- 440 Burnham, K. P., and D. R. Anderson. 2002. *Model Selection and Multimodel Inference*. second.  
441 Springer.
- 442 Canada, N. R. 2020. National Hydro Network - NHN - GeoBase Series.

- 443 [https://www.nrcan.gc.ca/science-and-data/science-and-research/earth-  
sciences/geography/topographic-information/geobase-surface-water-program-  
geeau/national-hydrographic-network/21361](https://www.nrcan.gc.ca/science-and-data/science-and-research/earth-<br/>444 sciences/geography/topographic-information/geobase-surface-water-program-<br/>445 geeau/national-hydrographic-network/21361).
- 446 Cox, A. R., R. J. Robertson, Á. Z. Lendvai, K. Everitt, and F. Bonier. 2019. Rainy springs linked  
447 to poor nestling growth in a declining avian aerial insectivore (*Tachycineta bicolor*).  
448 *Proceedings of the Royal Society B: Biological Sciences* 286:20190018.
- 449 Crick, H. Q. P. 2004. The impact of climate change on birds. *Ibis* 146:48–56.
- 450 DiBartolomeis, M., S. Kegley, P. Mineau, R. Radford, and K. Klein. 2019. An assessment of  
451 acute insecticide toxicity loading (AITL) of chemical pesticides used on agricultural land in  
452 the United States. *PLOS ONE* 14:e0220029.
- 453 Dunn, P. O., and D. W. Winkler. 1999. Climate change has affected the breeding date of tree  
454 swallows throughout North America. *Proceedings of the Royal Society of London. Series*  
455 *B: Biological Sciences* 266:2487–2490.
- 456 Elgin, A. S., R. G. Clark, and C. A. Morrissey. 2020. Tree Swallow selection for wetlands in  
457 agricultural landscapes predicted by central-place foraging theory. *The Condor* 122:1–12.
- 458 Eng, M. L., B. J. M. Stutchbury, and C. A. Morrissey. 2019. A neonicotinoid insecticide reduces  
459 fueling and delays migration in songbirds. *Science* 365:1177–1180.
- 460 Evans, K. L., R. B. Bradbury, and J. D. Wilson. 2003. Selection of hedgerows by Swallows  
461 *Hirundo rustica* foraging on farmland: the influence of local habitat and weather. *Bird Study*  
462 50:8–14.
- 463 Evens, R., N. Beenaerts, T. Neyens, N. Witters, K. Smeets, and T. Artois. 2018. Proximity of  
464 breeding and foraging areas affects foraging effort of a crepuscular, insectivorous bird.  
465 *Scientific Reports* 8:1–11.
- 466 Fahrig, L., J. Baudry, L. Brotons, F. G. Burel, T. O. Crist, R. J. Fuller, C. Sirami, G. M.  
467 Siriwardena, and J.-L. Martin. 2011. Functional landscape heterogeneity and animal  
468 biodiversity in agricultural landscapes. *Ecology Letters* 14:101–112.
- 469 Filzmoser, P., K. Hron, and C. Reimann. 2009. Principal component analysis for compositional  
470 data with outliers. *Environmetrics* 20:621–632.
- 471 Garrett, D. R., F. Pelletier, D. Garant, and M. Bélisle. 2021a. Combined influence of food  
472 availability and agricultural intensification on a declining aerial insectivore.  
473 [bioRxiv:10.1101/2021.02.02.427782](https://doi.org/10.1101/2021.02.02.427782).
- 474 Garrett, D. R., F. Pelletier, D. Garant, and M. Bélisle. 2021b. Negative effects of agricultural  
475 intensification on energetic gain rates of a declining aerial insectivore.  
476 [bioRxiv:10.1101/2021.03.24.436831](https://doi.org/10.1101/2021.03.24.436831).
- 477 Geary, B., P. L. Leberg, K. M. Purcell, S. T. Walter, and J. Karubian. 2020. Breeding Brown

- 478 Pelicans Improve Foraging Performance as Energetic Needs Rise. *Scientific Reports* 10:1–  
479 9.
- 480 Gibbons, D., C. A. Morrissey, and P. Mineau. 2015. A review of the direct and indirect effects of  
481 neonicotinoids and fipronil on vertebrate wildlife. *Environmental Science and Pollution*  
482 *Research* 22:103–118.
- 483 Giroux, I. 2019. Présence de pesticides dans l’eau au Québec: Portrait et tendances dans les  
484 zones de maïs et de soya – 2015 à 2017, Québec, ministère de l’Environnement et de la  
485 Lutte contre les changements climatiques, Direction générale du suivi de l’état de l’environ.
- 486 Grue, C. E., P. L. Gibert, and M. E. Seeley. 1997. Neurophysiological and Behavioral Changes  
487 in Non-Target Wildlife Exposed to Organophosphate and Carbamate Pesticides:  
488 Thermoregulation, Food Consumption, and Reproduction. *American Zoologist* 37:369–388.
- 489 Grübler, M. U., M. Morand, and B. Naef-Daenzer. 2008. A predictive model of the density of  
490 airborne insects in agricultural environments. *Agriculture, Ecosystems & Environment*  
491 123:75–80.
- 492 Hartig, F. 2020. DHARMA: Residual Diagnostics for Hierarchical (Multi-Level / Mixed)  
493 Regression Models. R package version 0.2.0.
- 494 Heenan, C. B. 2013. An Overview of the Factors Influencing the Morphology and Thermal  
495 Properties of Avian Nests. *Avian Biology Research* 6:104–118.
- 496 Hinsley, S. A. 2000. The costs of multiple patch use by birds. *Landscape Ecology* 15:765–775.
- 497 Houle, C., F. Pelletier, M. Bélisle, and D. Garant. 2020. Impacts of environmental heterogeneity  
498 on natural selection in a wild bird population. *Evolution* 74:1142–1154.
- 499 Jobin, B., J. Beaulieu, M. Grenier, L. Bélanger, C. Maisonneuve, D. Bordage, and B. Filion.  
500 2003. Landscape changes and ecological studies in agricultural regions, Québec, Canada.  
501 *Landscape Ecology* 18:575–590.
- 502 Laplante, L. 2013. Influence de l’hétérogénéité et de la composition du paysage agricole sur la  
503 communauté de diptères schizophores du sud du québec (canada). Université de  
504 Sherbrooke.
- 505 Lopez-Antia, A., M. E. Ortiz-Santaliestra, F. Mougeot, and R. Mateo. 2015. Imidacloprid-treated  
506 seed ingestion has lethal effect on adult partridges and reduces both breeding investment  
507 and offspring immunity. *Environmental Research* 136:97–107.
- 508 Malaj, E., L. Freistadt, and C. A. Morrissey. 2020. Spatio-Temporal Patterns of Crops and  
509 Agrochemicals in Canada Over 35 Years. *Frontiers in Environmental Science* 8:1–12.
- 510 Marcelino, J., J. P. Silva, J. Gameiro, A. Silva, F. C. Rego, F. Moreira, and I. Catry. 2020.  
511 Extreme events are more likely to affect the breeding success of lesser kestrels than average  
512 climate change. *Scientific Reports* 10:7207.

- 513 Marrot, P., D. Garant, and A. Charmantier. 2017. Multiple extreme climatic events strengthen  
514 selection for earlier breeding in a wild passerine. *Philosophical Transactions of the Royal*  
515 *Society B: Biological Sciences* 372:20160372.
- 516 Maxwell, S. L., R. A. Fuller, T. M. Brooks, and J. E. M. Watson. 2016. Biodiversity: The  
517 ravages of guns, nets and bulldozers. *Nature* 536:143–145.
- 518 Mayne, G. J., C. A. Bishop, P. A. Martin, H. J. Boermans, and B. Hunter. 2005. Thyroid  
519 Function in Nestling Tree Swallows and Eastern Bluebirds Exposed to Non-Persistent  
520 Pesticides and p, p-DDE in Apple Orchards of Southern Ontario, Canada. *Ecotoxicology*  
521 14:381–396.
- 522 Mazerolle, M. J. 2020. AICcmodavg: model selection and multimodel inference based on  
523 (Q)AIC(c).
- 524 McCarty, J. P. 2001. Ecological Consequences of Recent Climate Change. *Conservation Biology*  
525 15:320–331.
- 526 McCarty, J. P., and D. W. Winkler. 1999. Relative importance off environmental variables in  
527 determining the growth off nestling Tree Swallows *Tachycineta bicolor*. *Ibis* 141:286–296.
- 528 MDDELCC. 2015. Ministère du Développement durable, de l’Environnement et de la Lutte  
529 contre les changements climatiques. Stratégie québécoise sur les pesticides 2015-2018.  
530 <http://www.mddelcc.gouv.qc.ca/>.
- 531 Mengelkoch, J. M., G. J. Niemi, and R. R. Regal. 2004. Diet of the nestling tree swallow. *The*  
532 *Condor* 106:423–429.
- 533 Mineau, P., and C. Palmer. 2013. The impact of the nation’s most widely used insecticides on  
534 birds. Cambridge University Press.
- 535 Møller, A. P., E. Flensted-Jensen, and W. Mardal. 2006. Rapidly advancing laying date in a  
536 seabird and the changing advantage of early reproduction. *Journal of Animal Ecology*  
537 75:657–665.
- 538 Moreno, J., S. González-Braojos, and R. Ruiz-de-Castañeda. 2015. A spring cold snap is  
539 followed by an extreme reproductive failure event in a mountain population of Pied  
540 Flycatchers *Ficedula hypoleuca*. *Bird Study* 62:466–473.
- 541 Nakagawa, S., and H. Schielzeth. 2013. A general and simple method for obtaining  $R^2$  from  
542 generalized linear mixed-effects models. *Methods in Ecology and Evolution* 4:133–142.
- 543 Nocera, J. J., J. M. Blais, D. V. Beresford, L. K. Finity, C. Grooms, L. E. Kimpe, K. Kyser, N.  
544 Michelutti, M. W. Reudink, and J. P. Smol. 2012. Historical pesticide applications  
545 coincided with an altered diet of aerially foraging insectivorous chimney swifts.  
546 *Proceedings of the Royal Society B: Biological Sciences* 279:3114–3120.
- 547 Olsson, O., J. S. Brown, and K. L. Helf. 2008. A guide to central place effects in foraging.



- 548           Theoretical Population Biology 74:22–33.
- 549   Pebesma, E. J. 2018. Simple Features for R: Standardized Support for Spatial Vector Data. *The*  
550           *R Journal* 10:439.
- 551   Pedersen, E. J., D. L. Miller, G. L. Simpson, and N. Ross. 2019. Hierarchical generalized  
552           additive models in ecology: an introduction with mgcv. *PeerJ* 7:e6876.
- 553   Perkins-Kirkpatrick, S. E., and S. C. Lewis. 2020. Increasing trends in regional heatwaves.  
554           *Nature Communications* 11:3357.
- 555   Pipoly, I., V. Bókony, G. Seress, K. Szabó, and A. Liker. 2013. Effects of Extreme Weather on  
556           Reproductive Success in a Temperate-Breeding Songbird. *PLoS ONE* 8:e80033.
- 557   Pisa, L. W., V. Amaral-Rogers, L. P. Belzunces, J. M. Bonmatin, C. A. Downs, D. Goulson, D.  
558           P. Kreuzweiser, C. Krupke, M. Liess, M. McField, C. A. Morrissey, D. A. Noome, J.  
559           Settele, N. Simon-Delso, J. D. Stark, J. P. Van der Sluijs, H. Van Dyck, and M. Wiemers.  
560           2015. Effects of neonicotinoids and fipronil on non-target invertebrates. *Environmental*  
561           *Science and Pollution Research* 22:68–102.
- 562   Porlier, M., A. Charmantier, P. Bourgault, P. Perret, J. Blondel, and D. Garant. 2012. Variation  
563           in phenotypic plasticity and selection patterns in blue tit breeding time: between- and  
564           within-population comparisons. *Journal of Animal Ecology* 81:1041–1051.
- 565   Poulin, B., G. Lefebvre, and L. Paz. 2010. Red flag for green spray: adverse trophic effects of Bt  
566           on breeding birds. *Journal of Applied Ecology* 47:884–889.
- 567   QGIS. 2020. QGIS Geographic Information System. QGIS Association. <http://www.qgis.org>.
- 568   R Core Team. 2019. R: A language and environment for statistical computing.
- 569   Rahmstorf, S., and D. Coumou. 2011. Increase of extreme events in a warming world.  
570           *Proceedings of the National Academy of Sciences* 108:17905–17909.
- 571   Rainho, A., and J. M. Palmeirim. 2011. The Importance of Distance to Resources in the Spatial  
572           Modelling of Bat Foraging Habitat. *PLoS ONE* 6:e19227.
- 573   Rendell, W. B., and R. J. Robertson. 1989. Nest-Site Characteristics, Reproductive Success and  
574           Cavity Availability for Tree Swallows Breeding in Natural Cavities. *The Condor* 91:875.
- 575   Rendell, W. B., and R. J. Robertson. 1990. Influence of Forest Edge on Nest-Site Selection by  
576           Tree Swallows. *Wilson Journal of Ornithology* 102:634–644.
- 577   Robertson, R. J., and W. B. Rendell. 2001. A long-term study of reproductive performance in  
578           tree swallows: the influence of age and senescence on output. *Journal of Animal Ecology*  
579           70:1014–1031.
- 580   Rosenberg, K. V., A. M. Dokter, P. J. Blancher, J. R. Sauer, A. C. Smith, P. A. Smith, J. C.  
581           Stanton, A. Panjabi, L. Helft, M. Parr, and P. P. Marra. 2019. Decline of the North



- 582 American avifauna. *Science* 366:120–124.
- 583 Ruiz, J., and G. Domon. 2009. Analysis of landscape pattern change trajectories within areas of  
584 intensive agricultural use: case study in a watershed of southern Québec, Canada.  
585 *Landscape Ecology* 24:419–432.
- 586 Sheldon, B. C., L. E. B. Kruuk, and J. Merila. 2003. Natural selection and inheritance of  
587 breeding time and clutch size in the collared flycatcher. *Evolution* 57:406–420.
- 588 Shipley, J. R., C. W. Twining, C. C. Taff, M. N. Vitousek, A. Flack, and D. W. Winkler. 2020.  
589 Birds advancing lay dates with warming springs face greater risk of chick mortality.  
590 *Proceedings of the National Academy of Sciences* 117:25590–25594.
- 591 Shutler, D., D. J. T. Hussell, D. R. Norris, D. W. Winkler, R. J. Robertson, F. Bonier, W. B.  
592 Rendell, M. Bélisle, R. G. Clark, R. D. Dawson, N. T. Wheelwright, M. P. Lombardo, P. A.  
593 Thorpe, M. a. Truan, R. Walsh, M. L. Leonard, A. G. Horn, C. M. Vleck, D. Vleck, A. P.  
594 Rose, L. a. Whittingham, P. O. Dunn, K. a. Hobson, and M. T. Stanback. 2012.  
595 Spatiotemporal Patterns in Nest Box Occupancy by Tree Swallows Across North America.  
596 *Avian Conservation and Ecology* 7:art3.
- 597 Sigouin, A., M. Bélisle, D. Garant, and F. Pelletier. 2021. Agricultural pesticides and  
598 ectoparasites: potential combined effects on the physiology of a declining aerial insectivore.  
599 *Conservation Physiology* 9:1–16.
- 600 Spiller, K. J., and R. Dettmers. 2019. Evidence for multiple drivers of aerial insectivore declines  
601 in North America. *The Condor* 121:1–13.
- 602 Staggenborg, J., H. M. Schaefer, C. Stange, B. Naef-Daenzer, and M. U. Grüebler. 2017. Time  
603 and travelling costs during chick-rearing in relation to habitat quality in Little Owls *Athene*  
604 *noctua*. *Ibis* 159:519–531.
- 605 Stanton, R., C. A. Morrissey, and R. G. Clark. 2016. Tree Swallow (*Tachycineta bicolor*)  
606 foraging responses to agricultural land use and abundance of insect prey. *Canadian Journal*  
607 *of Zoology* 94:637–642.
- 608 Stanton, R., C. A. Morrissey, and R. G. Clark. 2018. Analysis of trends and agricultural drivers  
609 of farmland bird declines in North America: A review. *Agriculture, Ecosystems &*  
610 *Environment* 254:244–254.
- 611 Tapper, S., J. J. Nocera, and G. Burness. 2020. Experimental evidence that hyperthermia limits  
612 offspring provisioning in a temperate-breeding bird. *Royal Society Open Science*  
613 7:10.1098/rsos.201589.
- 614 Templ, M., K. Hron, and P. Filzmoser. 2011. *robCompositions: An R-package for Robust*  
615 *Statistical Analysis of Compositional Data*. Pages 341–355 *Compositional Data Analysis*.  
616 John Wiley & Sons, Ltd.

- 617 Townsend, A. K., T. S. Sillett, N. K. Lany, S. A. Kaiser, N. L. Rodenhouse, M. S. Webster, and  
618 R. T. Holmes. 2013. Warm Springs, Early Lay Dates, and Double Brooding in a North  
619 American Migratory Songbird, the Black-Throated Blue Warbler. *PLoS ONE* 8:e59467.
- 620 Twining, C. W., P. Lawrence, D. W. Winkler, A. S. Flecker, and J. T. Brenna. 2018. Conversion  
621 efficiency of  $\alpha$ -linolenic acid to omega-3 highly unsaturated fatty acids in aerial insectivore  
622 chicks. *The Journal of Experimental Biology* 221:jeb165373.
- 623 Visser, M. E., and P. Gienapp. 2019. Evolutionary and demographic consequences of  
624 phenological mismatches. *Nature Ecology & Evolution* 3:879–885.
- 625 Wagner, D. L. 2020. Insect Declines in the Anthropocene. *Annual Review of Entomology*  
626 65:457–480.
- 627 Williams, C. 1961. Studies in the effect of weather conditions on the activity and abundance of  
628 insect populations. *Philosophical Transactions of the Royal Society of London. Series B,*  
629 *Biological Sciences* 244:331–378.
- 630 Winkler, D. W., K. K. Hallinger, D. R. Ardia, R. J. Robertson, B. J. M. Stutchbury, and R. R.  
631 Cohen. 2020. Tree Swallow (*Tachycineta bicolor*). Page in A. F. Poole, editor. *Birds of the*  
632 *World*. Cornell Lab of Ornithology.
- 633 Winkler, D. W., M. K. Luo, and E. Rakhimberdiev. 2013. Temperature effects on food supply  
634 and chick mortality in tree swallows (*Tachycineta bicolor*). *Oecologia* 173:129–138.
- 635 Wood, S. N. 2015. Package ‘mgcv.’
- 636 Wuebbles, D. J., K. Kunkel, M. Wehner, and Z. Zobel. 2014. Severe Weather in United States  
637 Under a Changing Climate. *Eos, Transactions American Geophysical Union* 95:149–150.
- 638 Zuur, A. F., E. N. Ieno, N. Walker, A. A. Saveliev, and G. M. Smith. 2009. Mixed effects models  
639 and extensions in ecology with R. Page Smart Society. Springer New York.

640 **Tables and figures**

641 **Table 1:** Mean ( $\pm$ SD) of covariates used to model fledging success of 1,897 Tree Swallow  
642 broods between 2006 and 2016. Covariates were averaged over a 12-day period after hatching.  
643 Variable groups identify which covariates were present within models found in Appendix S1:  
644 Table S1.

| Covariate         | Acronym | Unit         | Mean $\pm$ SD       | Variable group |
|-------------------|---------|--------------|---------------------|----------------|
| Site score Comp.1 | Comp.1  | -            | 0.20 $\pm$ (1.80)   | Base/Land      |
| Site score Comp.2 | Comp.2  | -            | -0.18 $\pm$ (0.91)  | Base/Land      |
| Cold snap days    | CSD     | (day)        | 0.91 $\pm$ (1.12)   | Base/Snap      |
| Precipitation     | RN      | (ml)         | 6.81 $\pm$ (4.51)   | Base/Rain      |
| Open water        | WT      | (%)          | 0.01 $\pm$ (0.01)   | Base           |
| Prey availability | PA      | (g)          | 0.03 $\pm$ (0.02)   | Base           |
| Hatching day      | HD      | (Julian day) | 159.91 $\pm$ (5.76) | Base           |
| Brood size        | NN      | (nestlings)  | 4.83 $\pm$ (1.27)   | Base           |

645

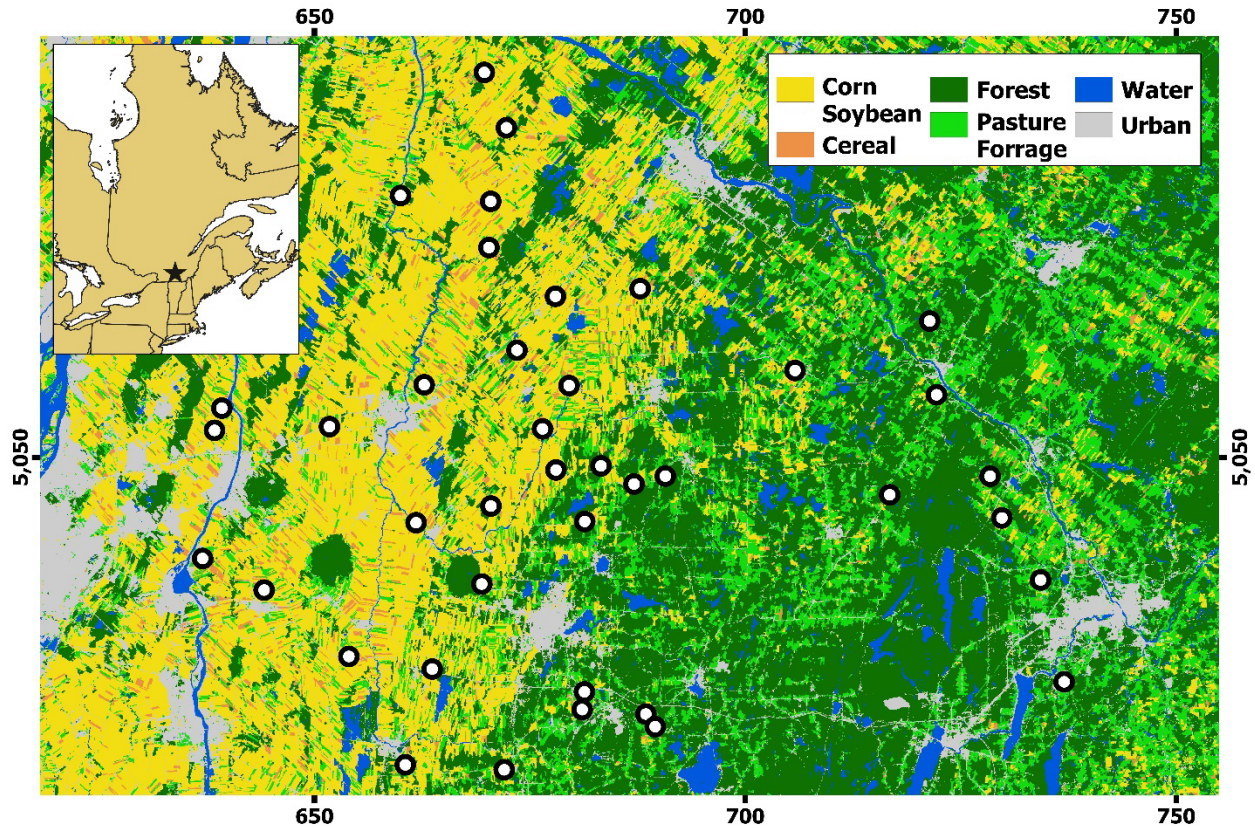

646

647 **Figure 1:** Location of the 40 farms (white dots) monitored across a gradient of agricultural  
648 intensification within southern Québec, Canada. Underlying image represents the agricultural  
649 gradient derived from the Annual crop inventory of 2013 (AAFC, 2018). Each pixel is either one  
650 of the five higher order land cover categories or open water. The star within inset map denotes  
651 the centroid of the study system. Projected coordinate reference system is the Universal  
652 Transverse Mercator (UTM) zone 18 north and graticules indicate the number of kilometers from  
653 some origin.

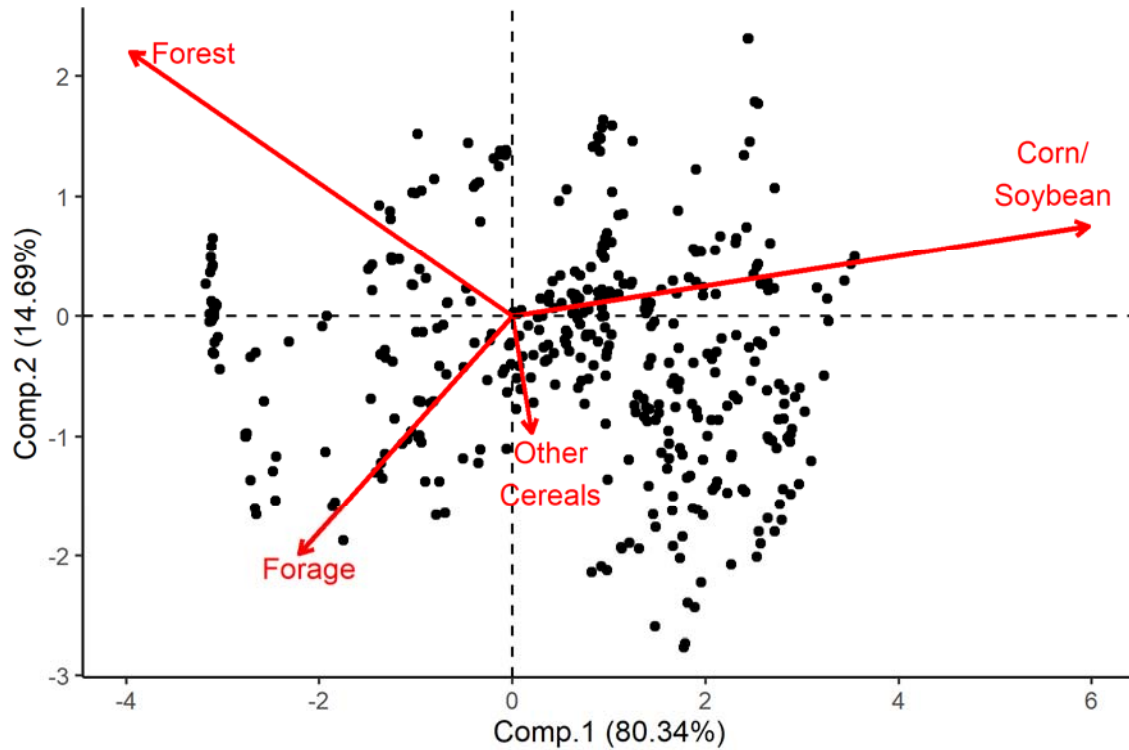

654

655 **Figure 2:** Robust compositional principal components analysis (PCA) of the landscape habitat  
656 composition surrounding each of the 40 farms monitored between 2006 and 2016. Arrows  
657 indicate the eigenvalue and loadings of each higher order land cover. Points within the  
658 background represent the site scores assigned to each farm and year combination and used to  
659 define the landscape context within 500 m of nest boxes (N=440 farms\*years).



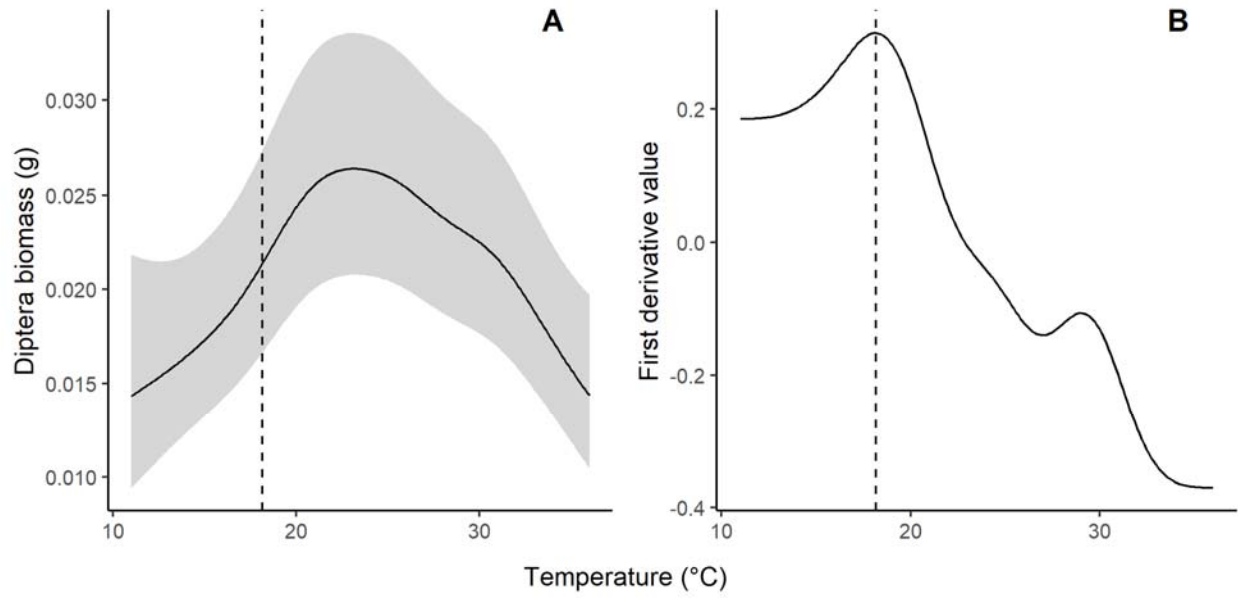

660

661 **Figure 3:** Functional relationship between Diptera biomass and the mean maximum temperature  
662 between the day of and day prior to sample collection (A) and the first derivative values of this  
663 relationship (B). Diptera biomass was derived with GAMMs using a Gamma distribution and a  
664 log link function. Vertical dashed line indicates the temperature at which the maximum of the  
665 first derivative was observed. Model controlled for, as tensor product smoothed terms, the Julian  
666 date and the interaction between sites score values (Comp.1 \* Comp.2), and the total  
667 precipitation two days prior to insect collection (N=15,916 samples). Model also included year  
668 and farm IDs as random effects.

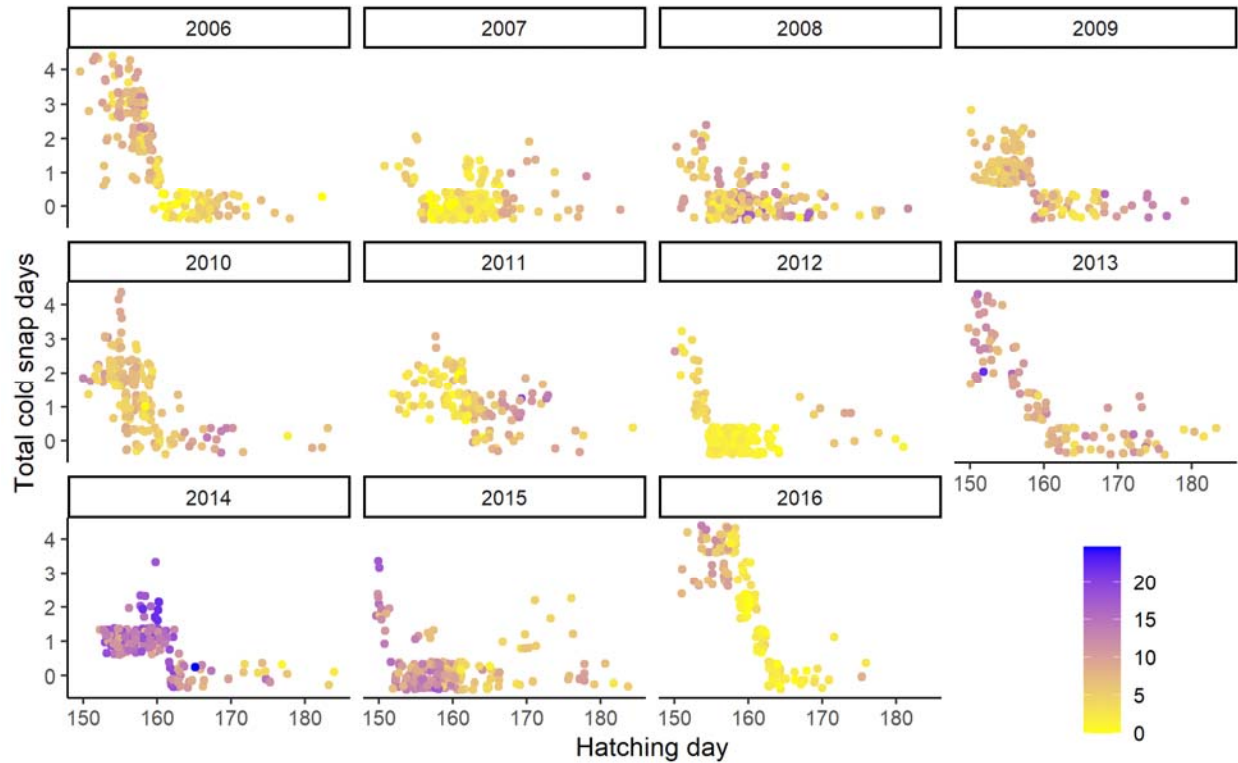

669

670 **Figure 4:** Number of cold snap days (jittered) experienced by Tree Swallow broods (N=1,897)  
671 according to their hatching dates between 2006 and 2016. Cold snap days were days on which  
672 maximum temperature on the farm did not surpass 18.2°C. Point color represents the mean daily  
673 precipitation volumes (ml) that broods experienced over a 12-day period after hatching.

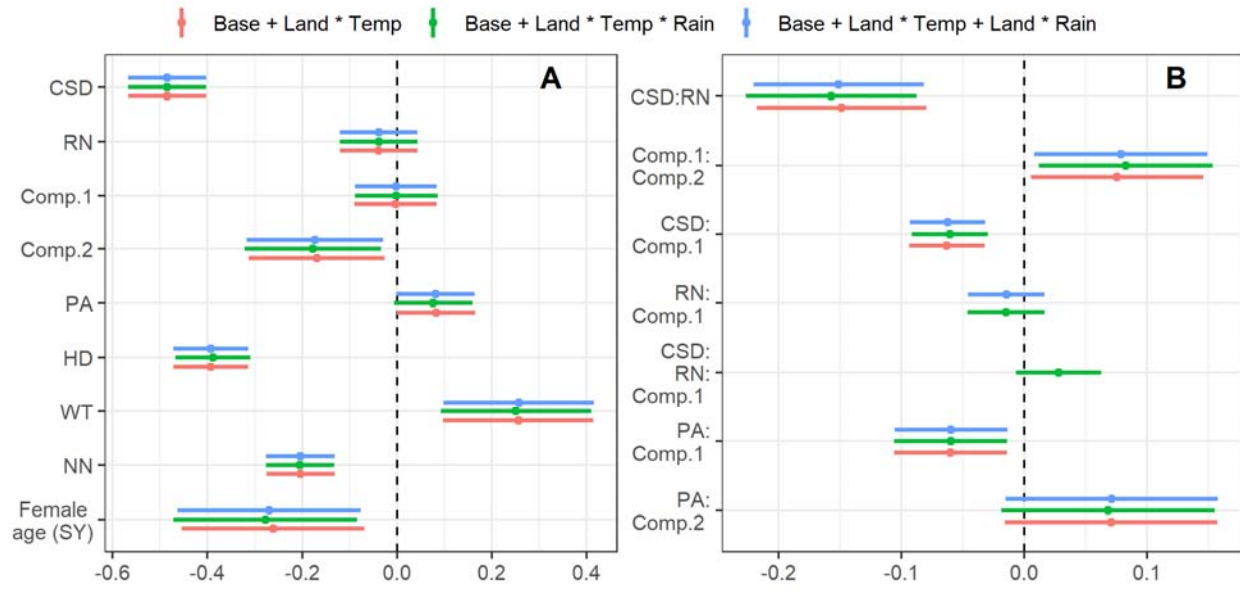

674

675 **Figure 5.** Standardized coefficient estimates and 95% confidence intervals of the three top  
676 ranking models, with combined  $w > 0.99$  and  $\max \Delta AICc = 1.2$ . Models quantified the effect of  
677 covariates on the fledging success of Tree Swallow broods (N=1,897) raised across a gradient of  
678 agricultural intensification within southern Québec, Canada, between 2006 and 2016. See Table  
679 1 for acronyms and summary statistics of fixed effects and Appendix S1: Table S1 for outcome  
680 of model selection. The GLMM with binomial response and logit link function included year,  
681 farm, and nest box IDs as random effects.



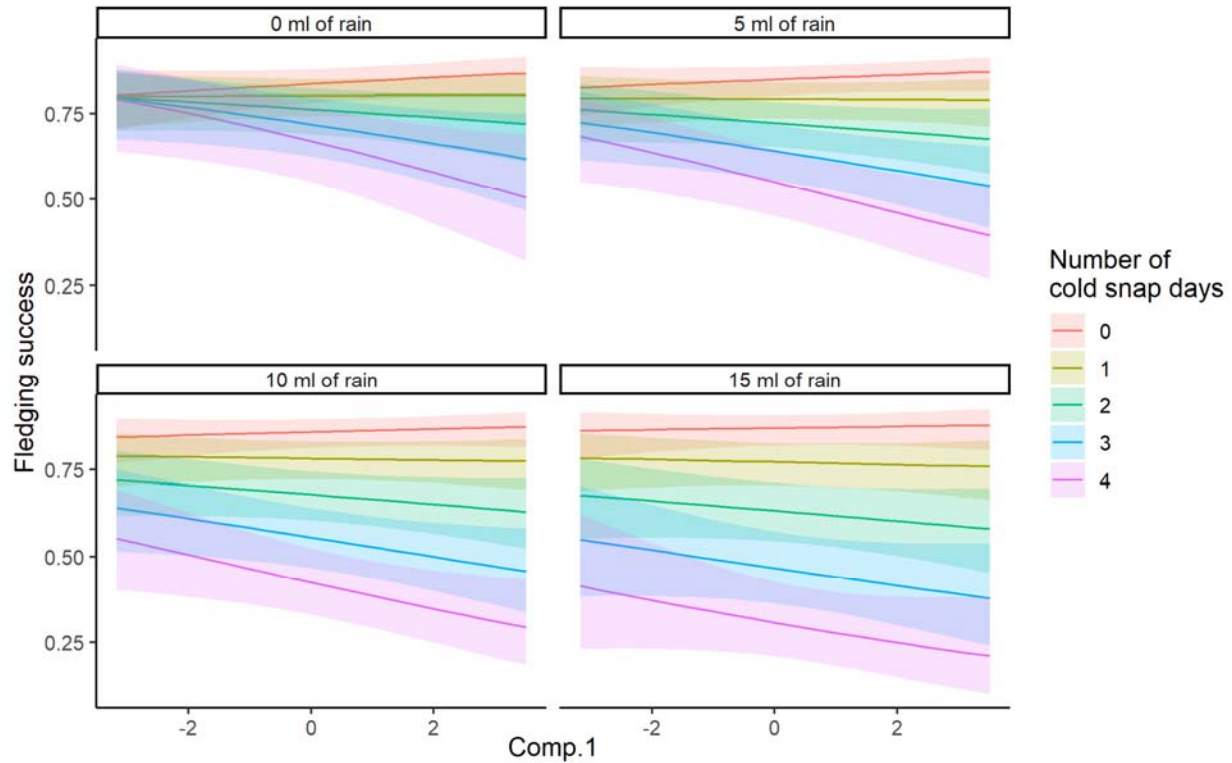

682

683 **Figure 6:** Unconditional model predictions (including unconditional 95% confidence intervals)  
684 of the effect of landscape context (Comp.1 in Figure 2) on the fledging success of Tree Swallow  
685 broods (N=1,897) exposed to different numbers of cold snap days (days which maximum  
686 temperature < 18.2°C) and, in each panel, the mean daily precipitation volumes (ml) over 12  
687 days post hatching. Predictions were made keeping all other covariates at their mean.
